# Supplementary material for: Suppressing vanadium crossover using sulfonated aromatic ion exchange membranes for high performance flow batteries
Source: Royal Society of Chemistry journal article supplement (doi:10.1039/d0ma00508h), 2020-01-01
Supplement: d0ma00508h1.pdf [file d0ma00508h1.pdf]

## Supplementary Information For

# Suppressing Vanadium Crossover Using Sulfonated Aromatic Ion Exchange Membranes for High Performance Flow Batteries

Tongshuai Wang, Junyoung Han, Kihyun Kim, Andreas Munchinger, Yuechen Gao, Alain

Farchi, Yoong-Kee Choe, Klaus-Dieter Kreuer\*, Chulsung Bae\*, and Sangil Kim\*

## Supplementary Information Contents

Supplementary Figure 1-11

Supplementary Table 1-4

Reference

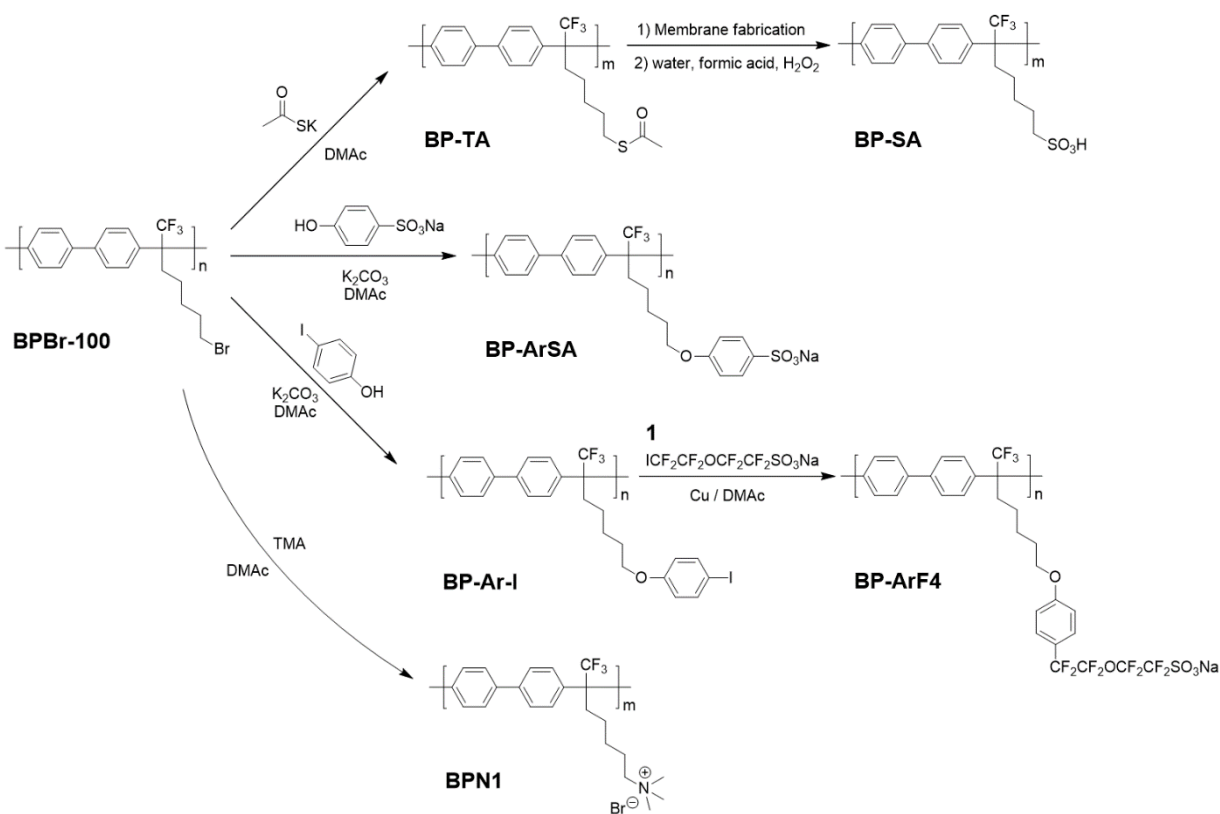

**Figure S1.** Synthesis of functionalized polymer electrolytes with different side chain structures. Compound 1: ICF<sub>2</sub>CF<sub>2</sub>OCF<sub>2</sub>CF<sub>2</sub>SO<sub>3</sub>Na. Related to the polymer Synthesis and characterization section in the main text.

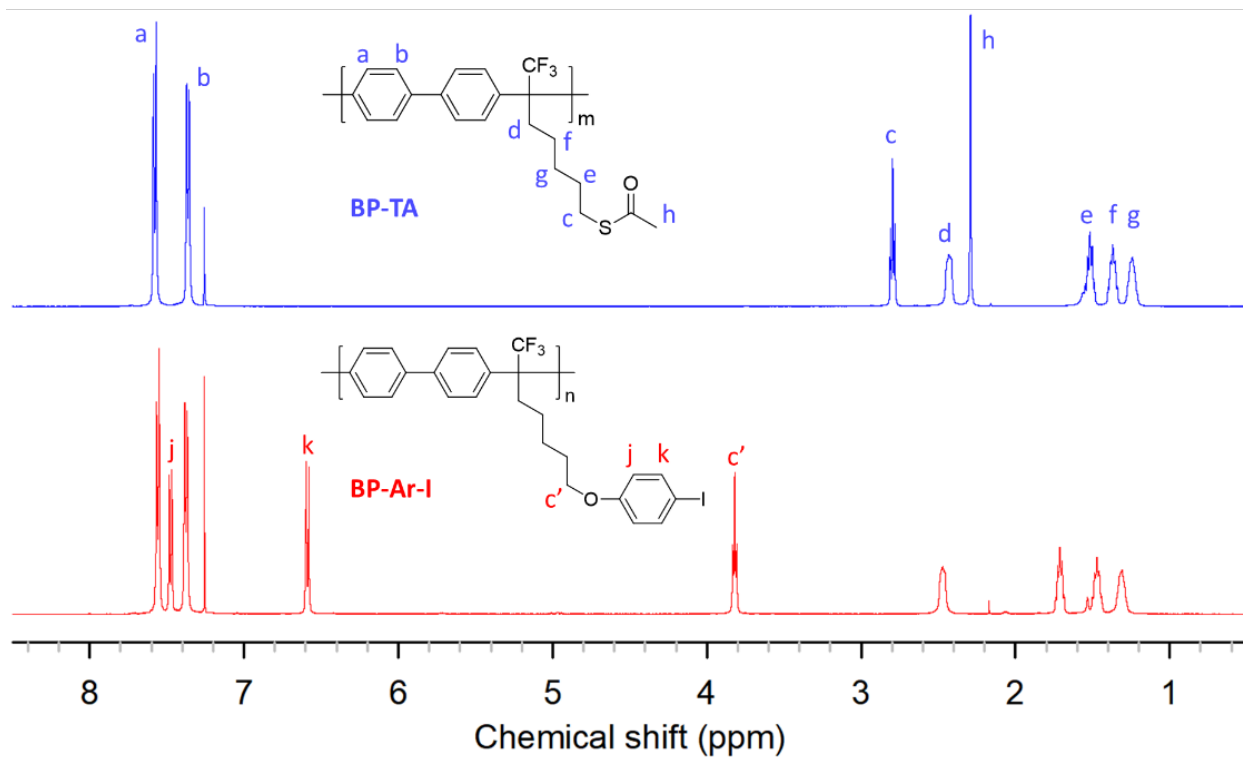

**Figure S2.** <sup>1</sup>H NMR spectra (CDCl<sub>3</sub>) of synthesized polymers: BP-TA (blue) and BP-Ar-I (red). BP-TA  $\delta$  (ppm) = 7.57 (d, 4H), 7.36 (d, 4H), 2.8 (t, 2H), 2.43 (m, 2H), 1.52 (m, 2H), 1.37 (m, 2H), 1.24 (m, 2H); BP-Ar-I  $\delta$  (ppm) = 7.57 (d, 4H), 7.49 (d, 2H), 7.39 (d, 4H), 6.60 (d, 2H), 3.82 (t, 2H), 2.47 (m, 2H), 1.71 (m, 2H), 1.47 (m, 2H), 1.31 (m, 2H). Related to the polymer Synthesis and characterization section in the main test.

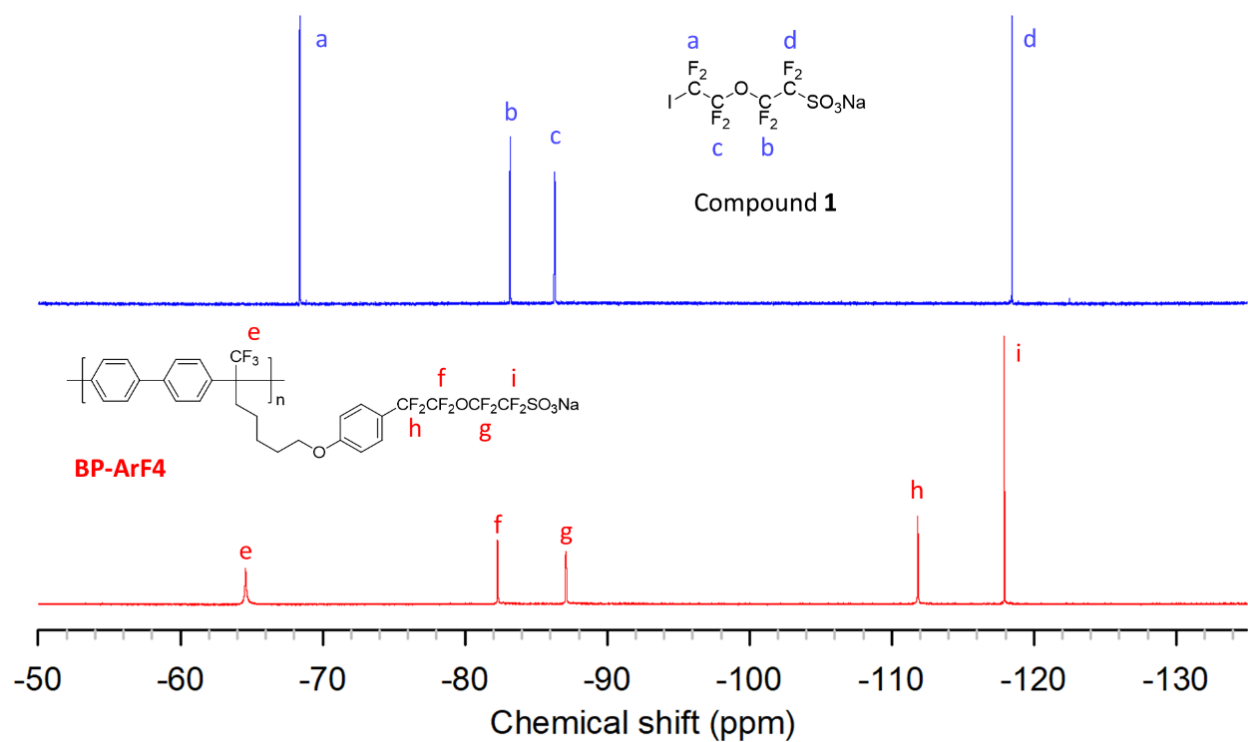

**Figure S3.**  $^{19}\text{F}$  NMR spectra of synthesized polymers: Compound 1 ( $\text{D}_2\text{O}$  solvent, blue) and BP-Ar-I ( $\text{DMSO-}d_6$ , red). Compound 1,  $\delta$  (ppm) = -68.38 (t, 2F), -83.17 (t, 2F), -86.31 (t, 2F), -118.46 (t, 2F); BP-Ar-I,  $\delta$  (ppm) = -64.57 (s, 3F,  $-\text{CF}_3$ ), -82.25 (t, 2F), -87.08 (t, 2F), -111.82 (t, 2F), -117.92 (t, 2F). Related to the polymer Synthesis and characterization section in the main text.

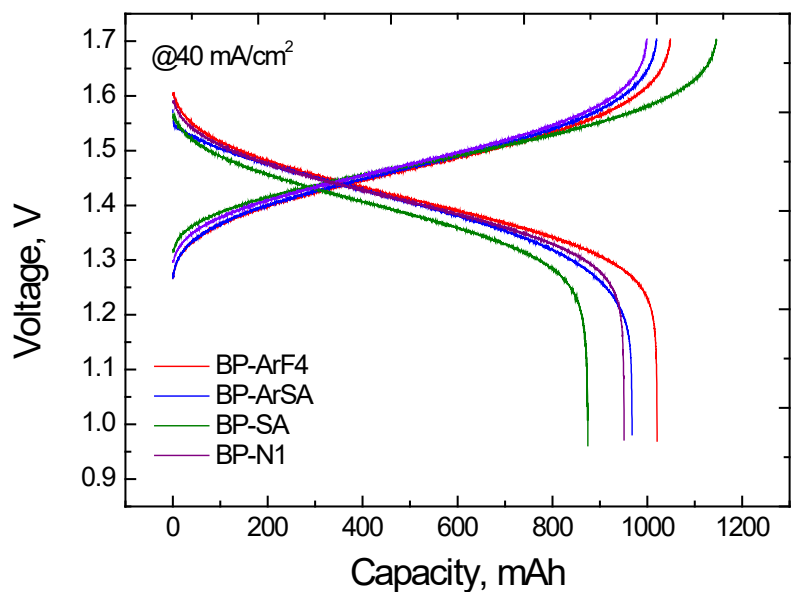

**Figure S4.** Charge-discharge curves for BP-ArF4, BP-ArSA, BP-SA, and BPN1 at current density of 40 mA/cm<sup>2</sup>.

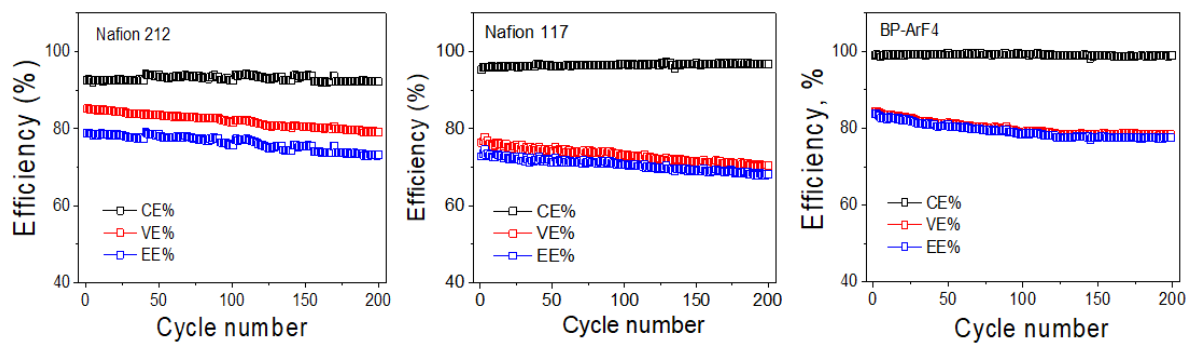

**Figure S5.** Comparison of VRFB cycle stability of BP-ArF4 membrane with Nafion 212 and 117 at 100 mA/cm<sup>2</sup>.

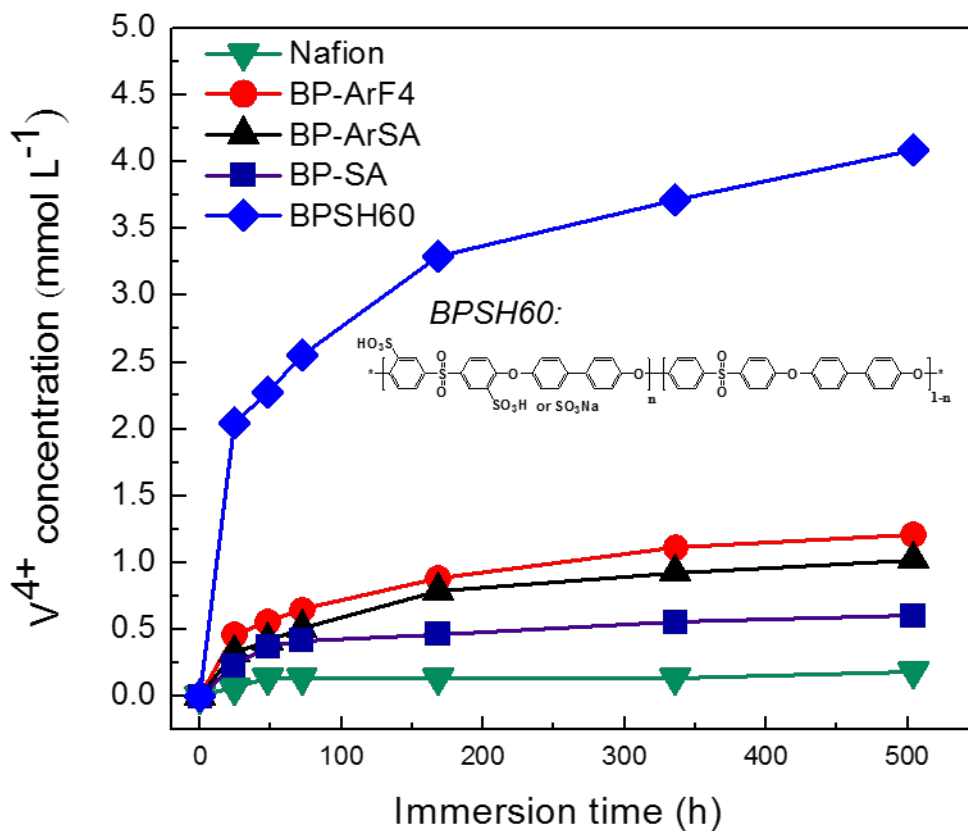

**Figure S6.** Chemical stability test results show increase of  $V^{4+}$  ions concentration with time of electrolyte (0.1 M  $V^{5+}$  in 4.0 M  $\text{H}_2\text{SO}_4$ ) solutions containing IEMs at room temperature. We also compare our biphenyl-based sulfonated membranes with another hydrocarbon PEM, BPSH-60. Related to the VRFB performance section in the main test.

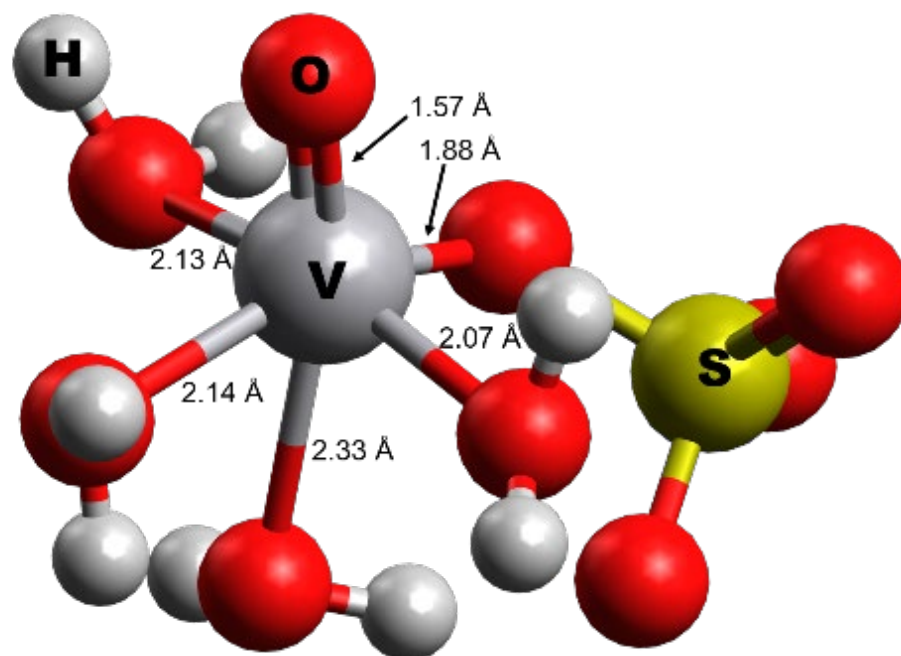

**Figure S7.** Optimized structures of  $\text{VO}(\text{SO}_4)(\text{H}_2\text{O})_4$ . Related to the SAXS and DFT studies: selective ion transport mechanism section in the main text.

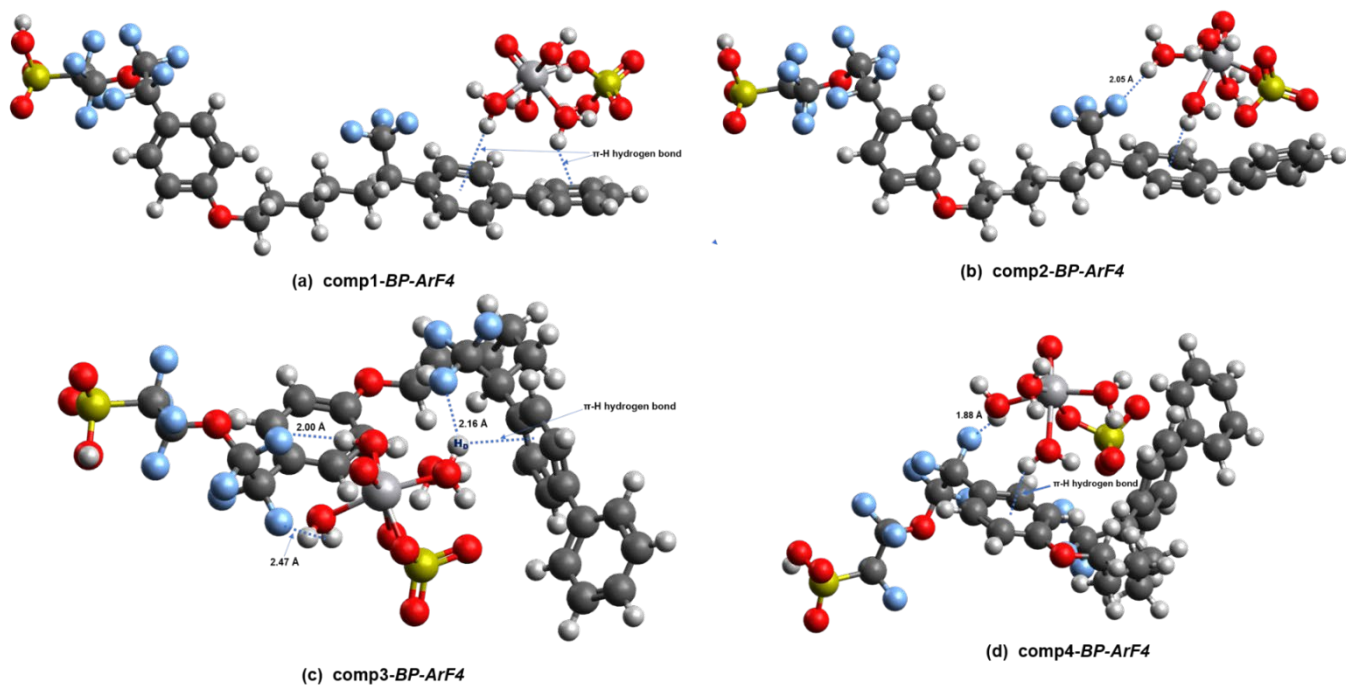

**Figure S8.** Optimized structures of BP-ArF4 --- vanadium ion complexes. Related to the SAXS and DFT studies: selective ion transport mechanism section in the main test.

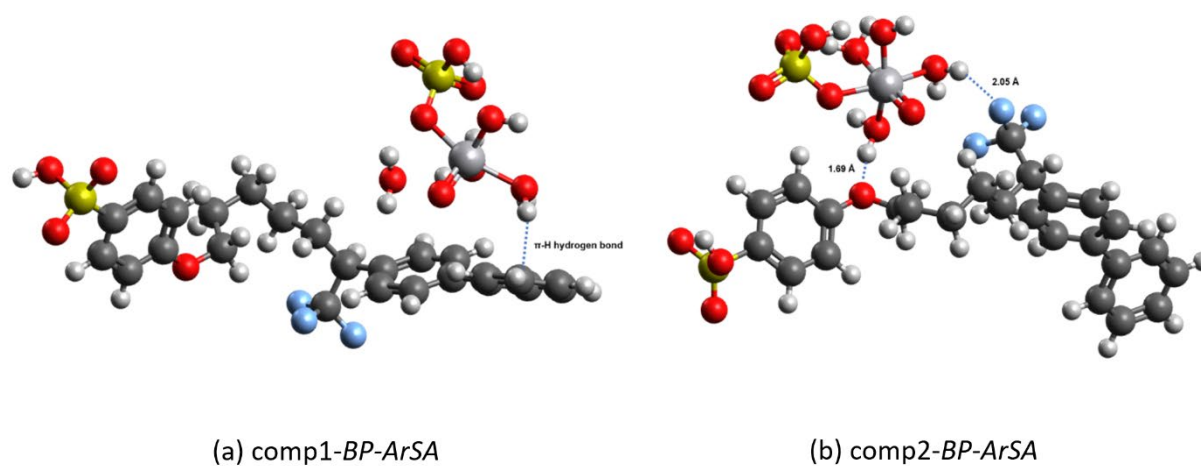

**Figure S9.** Optimized structures of BP-ArSA --- vanadium ion complexes. Related to the SAXS and DFT studies: selective ion transport mechanism section in the main test.

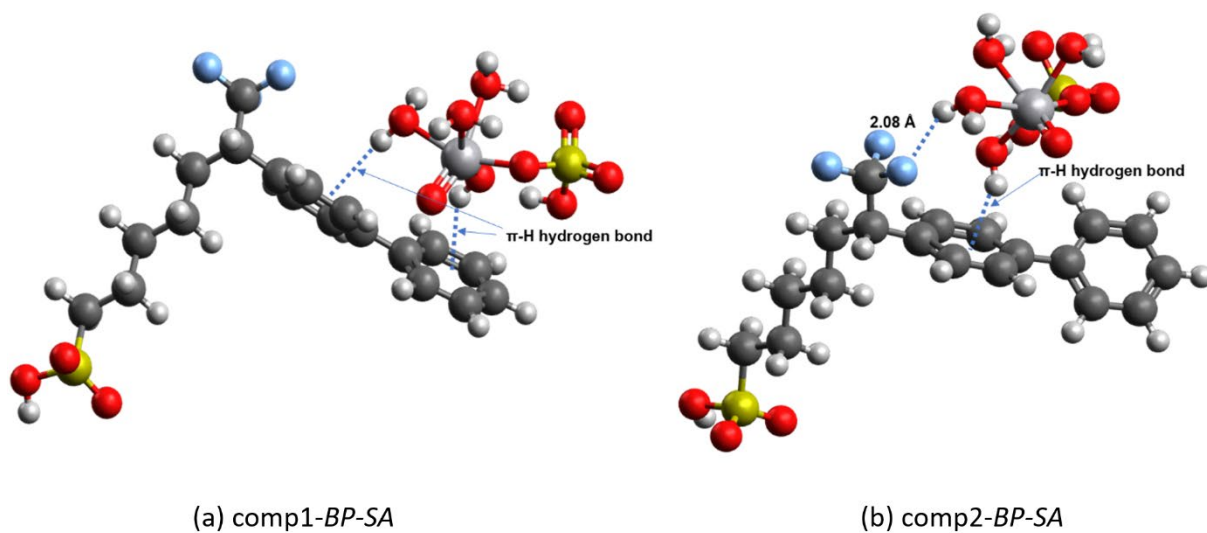

**Figure S10.** Optimized structures of BP-SA --- vanadium ion complexes. Related to the SAXS and DFT studies: selective ion transport mechanism section in the main test.

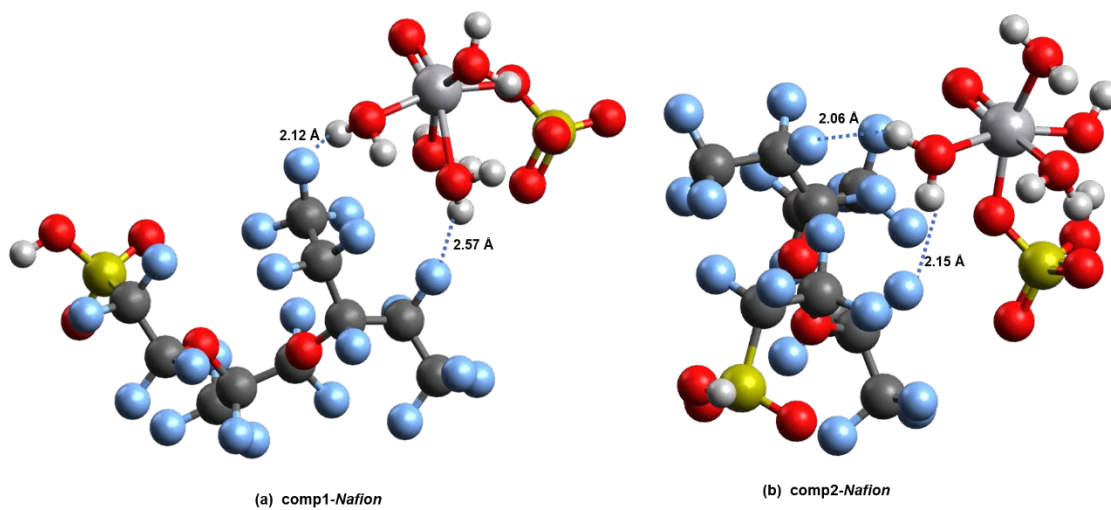

**Figure S11.** Optimized structures of *Nafion* --- vanadium ion complexes. Related to the SAXS and DFT studies: selective ion transport mechanism section in the main test.



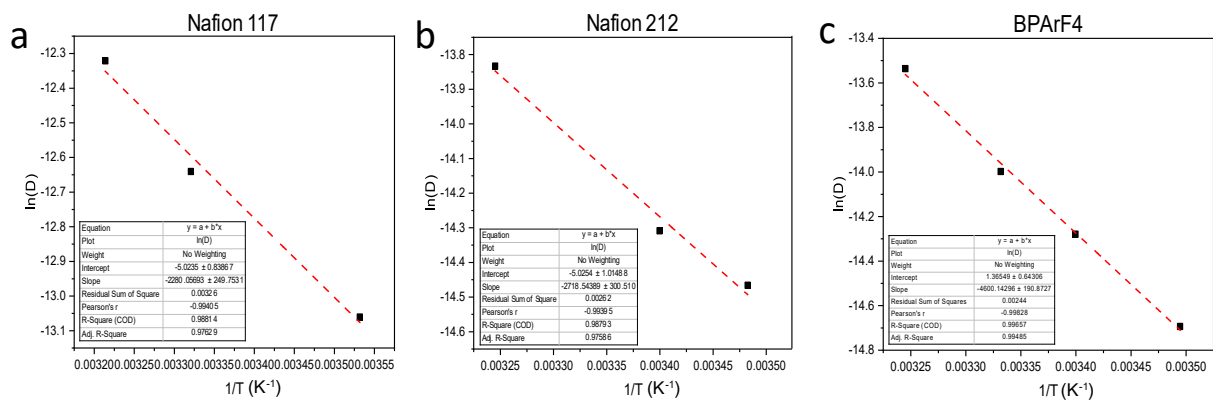

**Figure S12.** Arrhenius plot of the temperature dependence of vanadium permeability for: **a.** Nafion 117, **b.** Nafion212, and **c.** BP-ArF4. Related to the SAXS and DFT studies: selective ion transport mechanism section in the main text.

**Table S1.** Binding energy between the vanadium ion/BP-ArF4 and vanadium ion/Nafion. Related to the SAXS and DFT studies: selective ion transport mechanism section in the main test.

| Complexes            | Binding Energy (kcal/mol) |
|----------------------|---------------------------|
| <b>comp1-BP-ArF4</b> | 23.9                      |
| <b>comp2-BP-ArF4</b> | 22.6                      |
| <b>comp3-BP-ArF4</b> | 33.8                      |
| <b>comp4-BP-ArF4</b> | 26.3                      |
| <b>comp1-BP-ArSA</b> | 14.2                      |
| <b>comp2-BP-ArSA</b> | 20.5                      |
| <b>comp1-BP-SA</b>   | 21.4                      |
| <b>comp2-BP-SA</b>   | 19.0                      |
| <b>comp1-Nafion</b>  | 13.7                      |
| <b>comp2-Nafion</b>  | 21.0                      |

**Table S2.** Activation energy of Nafion 117, Nafion 212 and BP-ArF4 obtained by measuring vanadium ion permeability at different temperature. Related to the SAXS and DFT studies: selective ion transport mechanism section in the main test.

| Membrane          | Activation Energy (kcal/mol) |
|-------------------|------------------------------|
| <b>Nafion 117</b> | 4.53                         |
| <b>Nafion 212</b> | 5.40                         |
| <b>BP-ArF4</b>    | 9.14                         |

**Table S3.** Comparison of VO<sup>2+</sup> permeability and resistivity of membranes reported from literatures. Related to the breaking the trade-off limitations in IEMs section in the main test.

| Samples     | Type of membrane | VO <sup>2+</sup> Permeability ( $\times 10^{-7}$ cm <sup>2</sup> /min) | Resistivity ( $\Omega\cdot\text{cm}$ ) | Ref.      |
|-------------|------------------|------------------------------------------------------------------------|----------------------------------------|-----------|
| S-Radel     | PEM              | 2.1                                                                    | 46.79                                  | 1         |
| SPEEK       | PEM              | 11-12                                                                  | 59-61                                  | 2         |
| SPTKK       | PEM              | ~1.8                                                                   | 73.5                                   | 3         |
| SPTK        | PEM              | ~0.7                                                                   | 95.2                                   | 3         |
| SPAES       | PEM              | ~1.6                                                                   | ~70-80                                 | 4         |
| SPBI30      | PEM              | 0.17                                                                   | 86                                     | 5         |
| BPSH60      | PEM              | 210                                                                    | 8.3                                    | 6         |
| N115        | PEM              | 33                                                                     | 39.4                                   | 7         |
| XL100       | PEM              | 25.7                                                                   | 86.1                                   | 8         |
| SPFEK       | PEM              | 9.85                                                                   | 58.82                                  | 9         |
| Nafion117   | PEM              | 37                                                                     | 16.9                                   | 10        |
| Nafion212   | PEM              | 41                                                                     | 13.5                                   | 6         |
| BP-ArF4     | PEM              | 10                                                                     | 17.36                                  | This work |
| QA-PFE      | AEM              | ~0                                                                     | ~200                                   | 11        |
| QPPAE-2/1   | AEM              | ~0                                                                     | 154                                    | 12        |
| QPPP-2      | AEM              | 0.09                                                                   | 400                                    | 13        |
| QPEK-C-TMA+ | AEM              | 4.8                                                                    | 179                                    | 14        |
| C6QPSF      | AEM              | 0.5                                                                    | 63                                     | 15        |
| PAEK-API    | AEM              | 1.31                                                                   | 250                                    | 16        |
| QDAPP       | AEM              | 1.8                                                                    | 108                                    | 17        |
| PSF-TMA     | AEM              | 0.26                                                                   | 250                                    | 18        |
| PyPPEKK     | AEM              | 0.684                                                                  | 143                                    | 19        |

**Table S4.** Comparison of VRFB efficiencies, self-discharge time, and capacity retention/decay rate with PEMs and AEMs reported from literatures. Related to the breaking the trade-off limitations in IEMs section in the main test.

| Sample      | Type | CE (%)       | VE (%)     | EE (%)     | Current density (mA/cm <sup>2</sup> ) | Self-discharge time (hour) | Capacity retention/ Cycle # | Capacity decay rate (per cycle)/Current density (mA/cm <sup>2</sup> ) | Thickness (μm) | Vanadium sulfate/H <sub>2</sub> SO <sub>4</sub> concentration | Ref.      |
|-------------|------|--------------|------------|------------|---------------------------------------|----------------------------|-----------------------------|-----------------------------------------------------------------------|----------------|---------------------------------------------------------------|-----------|
| Nafion 115  | PEM  | 91.7         | 92.3       | 84.7       | 50                                    | 80                         | N/A                         | N/A                                                                   | 127            | 1.5M/3M                                                       | 20        |
| Nafion 212  | PEM  | 92           | 86         | 79         | 80                                    | 40                         | N/A                         | N/A                                                                   | 60             | 1.5M/3M                                                       | 21        |
| SPPEK       | PEM  | 98.8         | 75.5       | 74.6       | 60                                    | N/A                        | N/A                         | N/A                                                                   | 20             | 1.5M/3M                                                       | 1         |
| SPEEK40     | PEM  | 98.5         | 88.8       | 87.5       | 50                                    | 170                        | N/A                         | N/A                                                                   | 90             | 1.5M/3M                                                       | 20        |
| SPEEK50     | PEM  | 97.3         | 86.3       | 84.0       | 50                                    | N/A                        | N/A                         | N/A                                                                   | 85             | 1.5M/3M                                                       | 20        |
| SPEEK60     | PEM  | 96.1         | 87.6       | 84.2       | 50                                    | N/A                        | N/A                         | N/A                                                                   | 90             | 1.5M/3M                                                       | 20        |
| S-PAEK-40   | PEM  | 89.5         | 92.2       | 82.6       | 20                                    | N/A                        | ~60%/100                    | 0.4%/20                                                               | 172            | 1M/2M                                                         | 22        |
| Nafion 117  | PEM  | 90           | 94         | 84.6       | 40                                    | 30                         | ~50%/200                    | 0.25/80                                                               | 175            | 1.5M/2M                                                       | 23        |
| SPSF-62     | PEM  | 94.9         | 94.0       | 89.2       | 50                                    | 29                         | N/A                         | N/A                                                                   | 76             | 1.5M/3M                                                       | 24        |
| SPI-50      | PEM  | 96           | 93.8       | 90.1       | 40                                    | 110                        | 78.2%/100                   | 0.218/160                                                             | 71             | 1.5M/2M                                                       | 25        |
| SPBI-30     | PEM  | ~100<br>~100 | ~85<br>~88 | ~85<br>~88 | 80<br>60                              | 384                        | 54.95%/500                  | 0.09%/100                                                             | 35             | 1.5M/3M                                                       | 5         |
| BP-ArF4     | PEM  | 99.4         | 86.4       | 85.9       | 80                                    | 209.5                      | 84%/200                     | 0.08%/100                                                             | 88             | 1.6M/4M                                                       | This work |
|             |      | 99.2         | 89.5       | 88.8       | 60                                    |                            |                             |                                                                       |                |                                                               |           |
|             |      | 98.6         | 93.2       | 91.9       | 40                                    |                            |                             |                                                                       |                |                                                               |           |
|             |      | 97.3         | 96.4       | 93.9       | 20                                    |                            |                             |                                                                       |                |                                                               |           |
| QA-PFE      | AEM  | ~100         | ~78        | ~78        | 40                                    | N/A                        | N/A                         | N/A                                                                   | ~50            | 1M/2.5M                                                       | 11        |
| QPPAE-2/1   | AEM  | 99.3         | 88.9       | 88.4       | 50                                    | N/A                        | 70%/500                     | 0.08%/50                                                              | N/A            | 1.65M/3M                                                      | 12        |
| AIEM        | AEM  | 95.6         | 78.5       | 75.1       | 40                                    | ~300                       | N/A                         | N/A                                                                   | 43             | 1.5M/2.5M                                                     | 26        |
| QPPP-2      | AEM  | ~99          | ~87        | ~87        | 80                                    | N/A                        | 92%/30                      | 0.26%/80                                                              | ~35            | 1.65M/3M                                                      | 13        |
| QPEK-C-TMA+ | AEM  | ~99          | ~81        | ~80        | 30                                    | N/A                        | N/A                         | N/A                                                                   | 40             | 1.5M/3M                                                       | 14        |
| QAPPEK      | AEM  | 98.4         | 83.8       | 82.5       | 40                                    | N/A                        | N/A                         | N/A                                                                   | ~40            | 1.5M/3M                                                       | 27        |
| DF-a2       | AEM  | 98.5         | 84.6       | 83.3       | 50                                    | 35                         | N/A                         | N/A                                                                   | ~300           | 1.5M/3M                                                       | 28        |

|              |     |      |      |      |     |     |         |            |      |         |               |
|--------------|-----|------|------|------|-----|-----|---------|------------|------|---------|---------------|
| QS-<br>AIEM  | AEM | 98   | 91.5 | 89.7 | 50  | N/A | 70%/80  | 0.375%/N/A | ~40  | 1.5M/3M | <sup>15</sup> |
| PAEK-<br>API | AEM | 96.4 | 86.5 | 83.4 | 60  | N/A | 84%/100 | 0.16%/40   | ~130 | 1.5M/3M | <sup>16</sup> |
| QDAPP        | AEM | 99   | 85   | 85   | 200 | N/A | 94%/20  | 0.3%/N/A   | N/A  | 1.7M/5M | <sup>17</sup> |
| PyPPEK<br>K  | AEM | 98.4 | 90.3 | 88.9 | 40  | N/A | N/A     | N/A        | 45   | 1.5M/3M | <sup>19</sup> |

## Reference

- (1) Wang, N.; Yu, J.; Zhou, Z.; Fang, D.; Liu, S.; Liu, Y., SPPEK/TPA composite membrane as a separator of vanadium redox flow battery. *J. Membr. Sci.* **2013**, *437*, 114-121.
- (2) Dai, W.; Shen, Y.; Li, Z.; Yu, L.; Xi, J.; Qiu, X., SPEEK/Graphene oxide nanocomposite membranes with superior cyclability for highly efficient vanadium redox flow battery. *J. Mater. Chem. A* **2014**, *2* (31), 12423-12432.
- (3) Chen, D.; Wang, S.; Xiao, M.; Meng, Y., Synthesis and characterization of novel sulfonated poly (arylene thioether) ionomers for vanadium redox flow battery applications. *Energy Environ. Sci* **2010**, *3* (5), 622-628.
- (4) Chen, D.; Wang, S.; Xiao, M.; Meng, Y., Synthesis and properties of novel sulfonated poly (arylene ether sulfone) ionomers for vanadium redox flow battery. *Energy Conversion and Management* **2010**, *51* (12), 2816-2824.
- (5) Ding, L.; Song, X.; Wang, L.; Zhao, Z., Enhancing proton conductivity of polybenzimidazole membranes by introducing sulfonate for vanadium redox flow batteries applications. *J. Membr. Sci.* **2019**, *578*, 126-135.
- (6) Wang, T.; Moon, S. J.; Hwang, D.-S.; Park, H.; Lee, J.; Kim, S.; Lee, Y. M.; Kim, S., Selective ion transport for a vanadium redox flow battery (VRFB) in nano-crack regulated proton exchange membranes. *J. Membr. Sci.* **2019**, *583*, 16-22.
- (7) Zhou, X.; Zhao, T.; An, L.; Zeng, Y.; Zhu, X., Performance of a vanadium redox flow battery with a VANADion membrane. *Applied Energy* **2016**, *180*, 353-359.
- (8) Xie, W.; Darling, R. M.; Perry, M. L., Processing and pretreatment effects on vanadium transport in nafion membranes. *J. Electrochem. Soc.* **2016**, *163* (1), A5084-A5089.
- (9) Chen, D.; Wang, S.; Xiao, M.; Meng, Y., Preparation and properties of sulfonated poly (fluorenyl ether ketone) membrane for vanadium redox flow battery application. *J. Power Sources* **2010**, *195* (7), 2089-2095.
- (10) Teng, X.; Zhao, Y.; Xi, J.; Wu, Z.; Qiu, X.; Chen, L., Nafion/organically modified silicate hybrids membrane for vanadium redox flow battery. *J. Power Sources* **2009**, *189* (2), 1240-1246.
- (11) Chen, D.; Hickner, M. A.; Agar, E.; Kumbur, E. C., Selective anion exchange membranes for high coulombic efficiency vanadium redox flow batteries. *Electrochem. commun.* **2013**, *26*, 37-40.
- (12) Cha, M. S.; Lee, J. Y.; Kim, T.-H.; Jeong, H. Y.; Shin, H. Y.; Oh, S.-G.; Hong, Y. T., Preparation and characterization of crosslinked anion exchange membrane (AEM) materials with poly (phenylene ether)-based short hydrophilic block for use in electrochemical applications. *J. Membr. Sci.* **2017**, *530*, 73-83.
- (13) Cha, M. S.; Jo, S. W.; Han, S. H.; Hong, S. H.; So, S.; Kim, T.-H.; Oh, S.-G.; Hong, Y. T.; Lee, J. Y., Ether-free polymeric anion exchange materials with extremely low vanadium ion permeability and outstanding cell performance for vanadium redox flow battery (VRFB) application. *J. Power Sources* **2019**, *413*, 158-166.
- (14) Yun, S.; Parrondo, J.; Ramani, V., Derivatized cardo-polyetherketone anion exchange membranes for all-vanadium redox flow batteries. *J. Mater. Chem. A* **2014**, *2* (18), 6605-6615.
- (15) Chen, Y.; Zhang, S.; Jin, J.; Liu, C.; Liu, Q.; Jian, X., Poly (phthalazinone ether ketone) amphoteric ion exchange membranes with low water transport and vanadium permeability for vanadium redox flow battery application. *ACS Appl. Energy Mater.* **2019**, *2* (11), 8207-8218.
- (16) Ahn, Y.; Kim, D., Anion exchange membrane prepared from imidazolium grafted poly (arylene ether ketone) with enhanced durability for vanadium redox flow battery. *J. Ind. Eng. Chem.* **2019**, *71*, 361-368.
- (17) Sun, C.-N.; Tang, Z.; Belcher, C.; Zawodzinski, T. A.; Fujimoto, C., Evaluation of Diels–Alder poly (phenylene) anion exchange membranes in all-vanadium redox flow batteries. *Electrochem. commun.* **2014**, *43*, 63-66.

- (18) Min-suk, J. J.; Parrondo, J.; Arges, C. G.; Ramani, V., Polysulfone-based anion exchange membranes demonstrate excellent chemical stability and performance for the all-vanadium redox flow battery. *J. Mater. Chem. A* **2013**, *1* (35), 10458-10464.
- (19) Zhang, S.; Zhang, B.; Xing, D.; Jian, X., Poly (phthalazinone ether ketone ketone) anion exchange membranes with pyridinium as ion exchange groups for vanadium redox flow battery applications. *J. Mater. Chem. A* **2013**, *1* (39), 12246-12254.
- (20) Mai, Z.; Zhang, H.; Li, X.; Bi, C.; Dai, H., Sulfonated poly (tetramethyldiphenyl ether ether ketone) membranes for vanadium redox flow battery application. *J. Power Sources* **2011**, *196* (1), 482-487.
- (21) Zhang, F.; Zhang, H.; Qu, C., Influence of solvent on polymer prequaternization toward anion-conductive membrane fabrication for all-vanadium flow battery. *J. Phys. Chem. B* **2012**, *116* (30), 9016-9022.
- (22) Yang, S.; Ahn, Y.; Kim, D., Poly (arylene ether ketone) proton exchange membranes grafted with long aliphatic pendant sulfonated groups for vanadium redox flow batteries. *J. Mater. Chem. A* **2017**, *5* (5), 2261-2270.
- (23) Jiang, B.; Wu, L.; Yu, L.; Qiu, X.; Xi, J., A comparative study of Nafion series membranes for vanadium redox flow batteries. *J. Membr. Sci.* **2016**, *510*, 18-26.
- (24) Zhang, Y.; Zheng, L.; Liu, B.; Wang, H.; Shi, H., Sulfonated polysulfone proton exchange membrane influenced by a varied sulfonation degree for vanadium redox flow battery. *J. Membr. Sci.* **2019**, *584*, 173-180.
- (25) Wang, L.; Yu, L.; Mu, D.; Yu, L.; Wang, L.; Xi, J., Acid-base membranes of imidazole-based sulfonated polyimides for vanadium flow batteries. *J. Membr. Sci.* **2018**, *552*, 167-176.
- (26) Qiu, J.; Zhai, M.; Chen, J.; Wang, Y.; Peng, J.; Xu, L.; Li, J.; Wei, G., Performance of vanadium redox flow battery with a novel amphoteric ion exchange membrane synthesized by two-step grafting method. *J. Membr. Sci.* **2009**, *342* (1-2), 215-220.
- (27) Zhang, S.; Yin, C.; Xing, D.; Yang, D.; Jian, X., Preparation of chloromethylated/quaternized poly (phthalazinone ether ketone) anion exchange membrane materials for vanadium redox flow battery applications. *J. Membr. Sci.* **2010**, *363* (1-2), 243-249.
- (28) Wang, N.; Zhang, F.; Zhang, R.; Zhou, W.; Lu, D., Sulfonation of Poly (phenylene oxide) Anion Exchange Membrane for All Vanadium Flow Redox Battery. *Int. J. Electrochem. Sci* **2019**, *14*, 5508-5520.
